# Supplementary material
Source: Springer Nature journal article supplement (https://www.springermedizin.de/resource/supplementary/12885_2012_3849_MOESM1_ESM.pdf/9464592)

**A**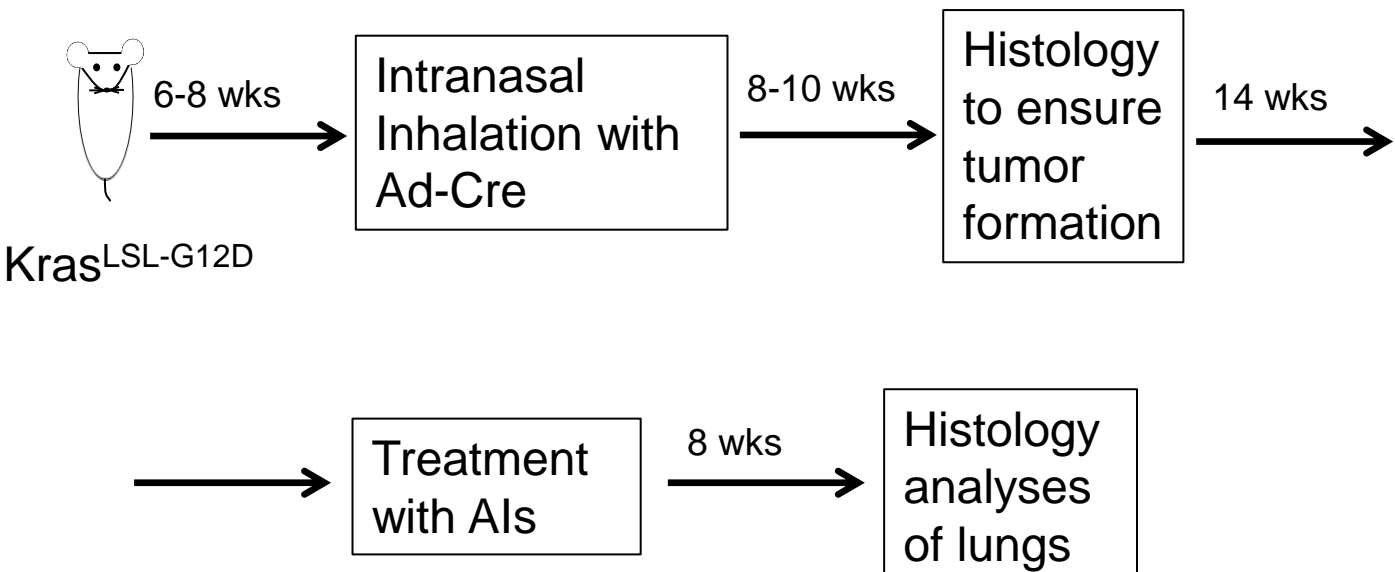**B**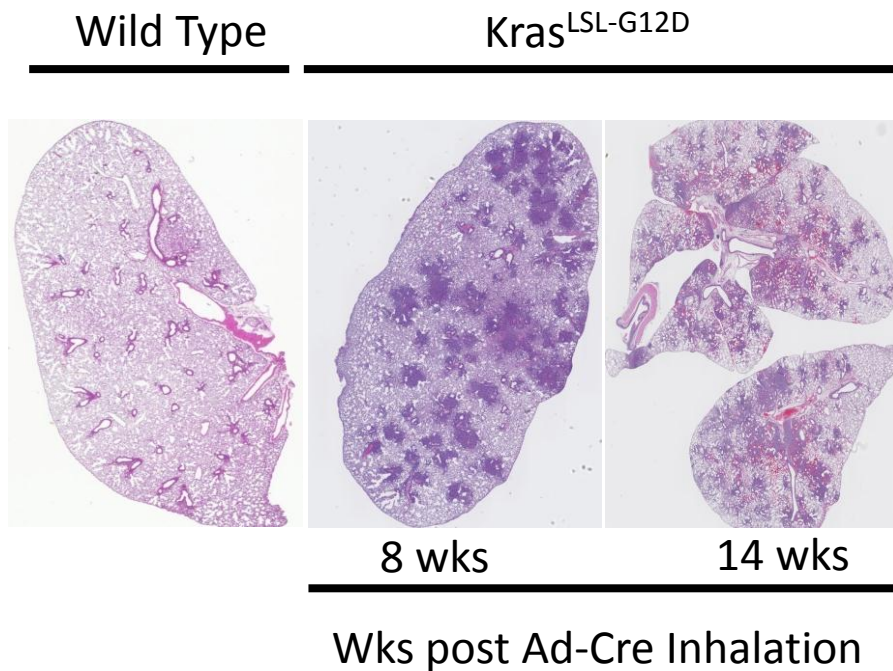

Supplement: MOESM1 [file 9464592]
